# Supplementary material for: Ontogenetic changes in limb posture, kinematics, forces and joint moments in American alligators (Alligator mississippiensis)
Source: Oxford University Press journal article supplement (doi:10.1242/jeb.242990), 2021-11-08
Supplement: jeb242990supp.pdf [file jeb242990supp.pdf]

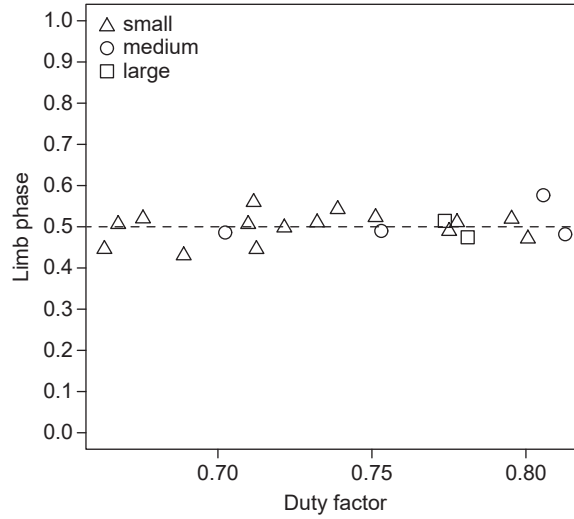

**Fig. S1. Relationship between limb phase (Hildebrand, 1976) and duty factor in three size classes of American alligators.** Comparisons include trials in which steady-speed fore- and hindlimb steps were filmed in a single video.

**Table S1. Sensitivity analysis of peak fore- and hindlimb joint moments in al09f21 (2.06 kg body mass) using either the dorsal, ventral, anterior, and posterior edge of each fore- and hindlimb joint landmark.**

[Click here to download Table S1](#)

**Table S2. Ordinary least squares regressions of the ankle dorsiflexion moment on the femur adduction angle in each individual**

| Size class | Individual | <i>n</i> | <i>R</i> <sup>2</sup> | Elevation | Slope  | <i>P</i> value |
|------------|------------|----------|-----------------------|-----------|--------|----------------|
| Small      | al10       | 9        | 0.314                 | 0.027     | -0.001 | 0.117          |
|            | al11       | 9        | 0.438                 | 0.028     | -0.002 | 0.052          |
|            | al12       | 4        | 0.144                 | 0.092     | -0.001 | 0.621          |
| Medium     | al07       | 8        | 0.519                 | -0.044    | -0.003 | 0.044          |
|            | al08       | 4        | 0.474                 | -0.026    | -0.002 | 0.311          |
|            | al09       | 9        | 0.074                 | 0.030     | -0.001 | 0.480          |
| Large      | al05       | 20       | 0.108                 | 0.039     | -0.001 | 0.157          |

Normalized moments [ $N \cdot m / (kg^{4/3})$ ] and angles were taken from mid-stance. Negative slopes indicate that more adducted (upright) postures have larger dorsiflexion moments at the ankle.

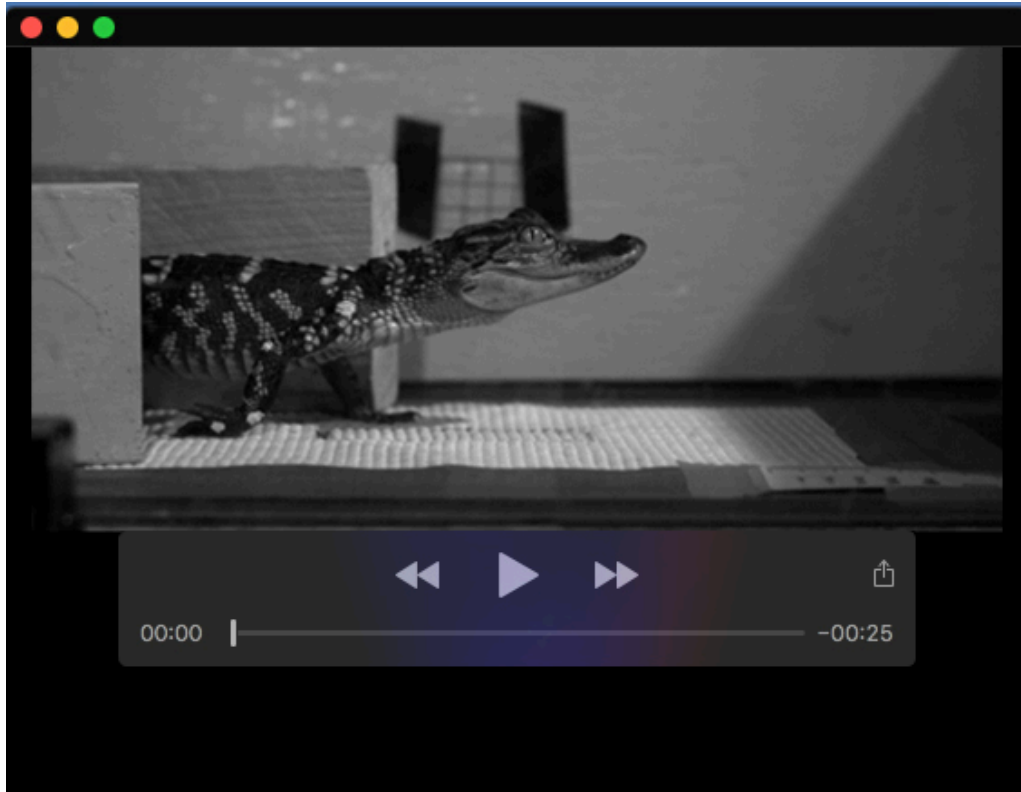

**Movie 1.** Representative walk (al10f18) of a small size alligator (0.1× speed).

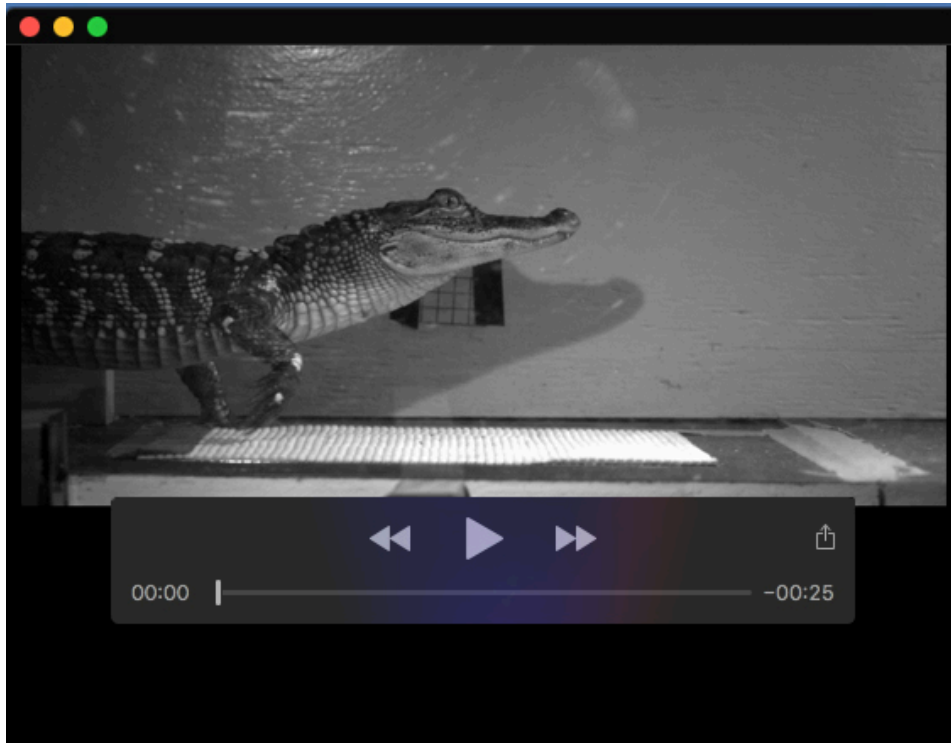

**Movie 2.** Representative walk (al09f21) of a medium size alligator (0.1× speed).

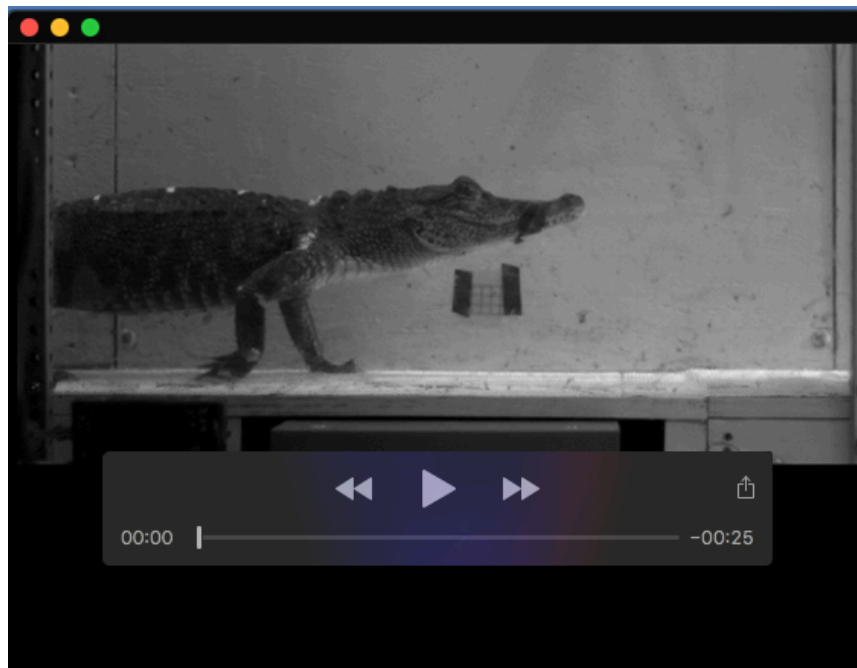

**Movie 3.** Representative walk (al05f77) of a large size alligator (0.1× speed).
